# Supplementary material for: Determination of the μ-Conotoxin PIIIA Specificity Against Voltage-Gated Sodium Channels from Binding Energy Calculations
Source: MDPI journal article supplement (doi:10.3390/md16050153), 2018-05-07
Supplement: s1 [file s1]

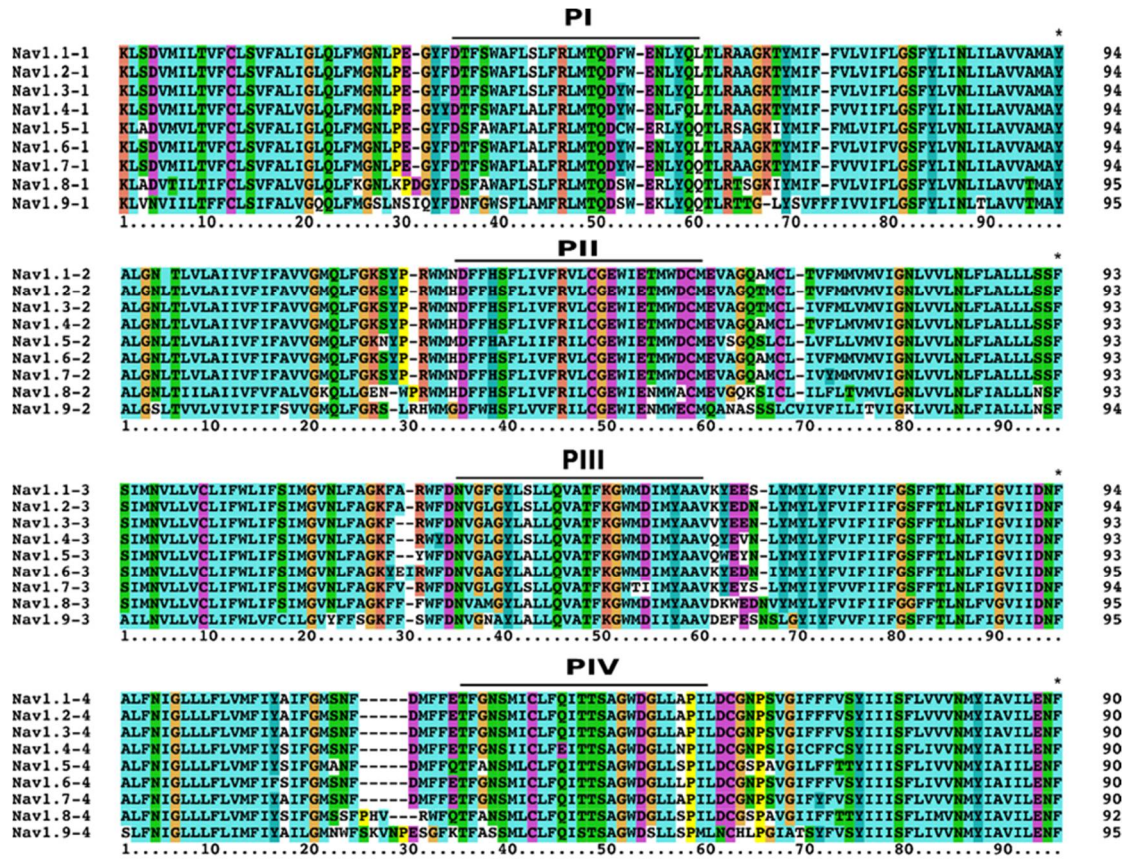

**Figure S1. Sequence alignment between the four PIIIA binding domains of the varied Nav subtypes.** Loops with low sequence identify as well as the voltage sensing domain (VSD) were truncated from the sequence alignment. The P loop from the four domains were labelled as PI to PIV.

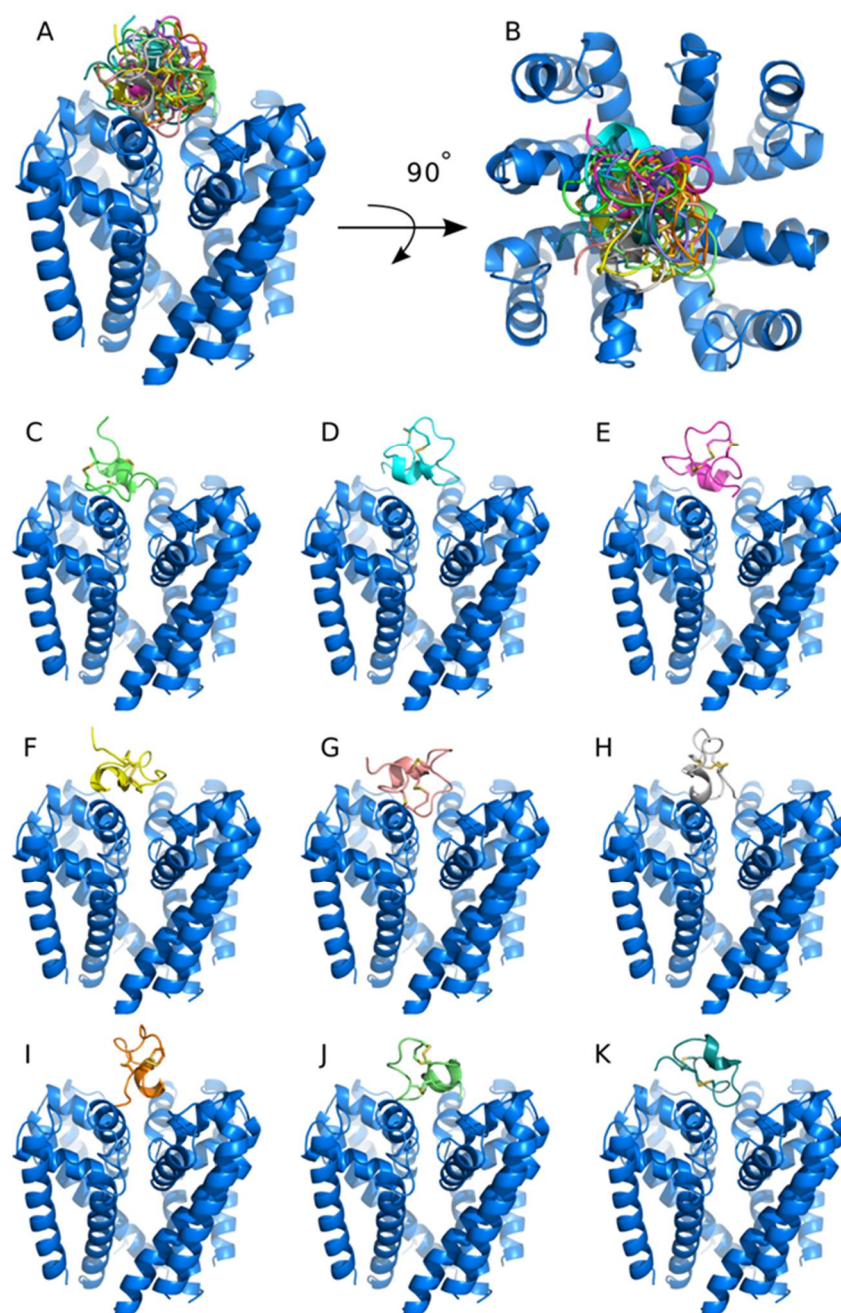

**Figure S2.** The top 10 conformations of PIIIA at the binding site of Nav1.4 from docking in **AutoDock**. A) and B) show the top 10 conformations of PIIIA together at the binding site of Nav1.4. Obviously, the top 10 conformations of PIIIA at the binding site are in varied orientations. C) – K) show the orientation of the top 10 conformations of PIIIA at the binding site of Nav1.4, respectively.

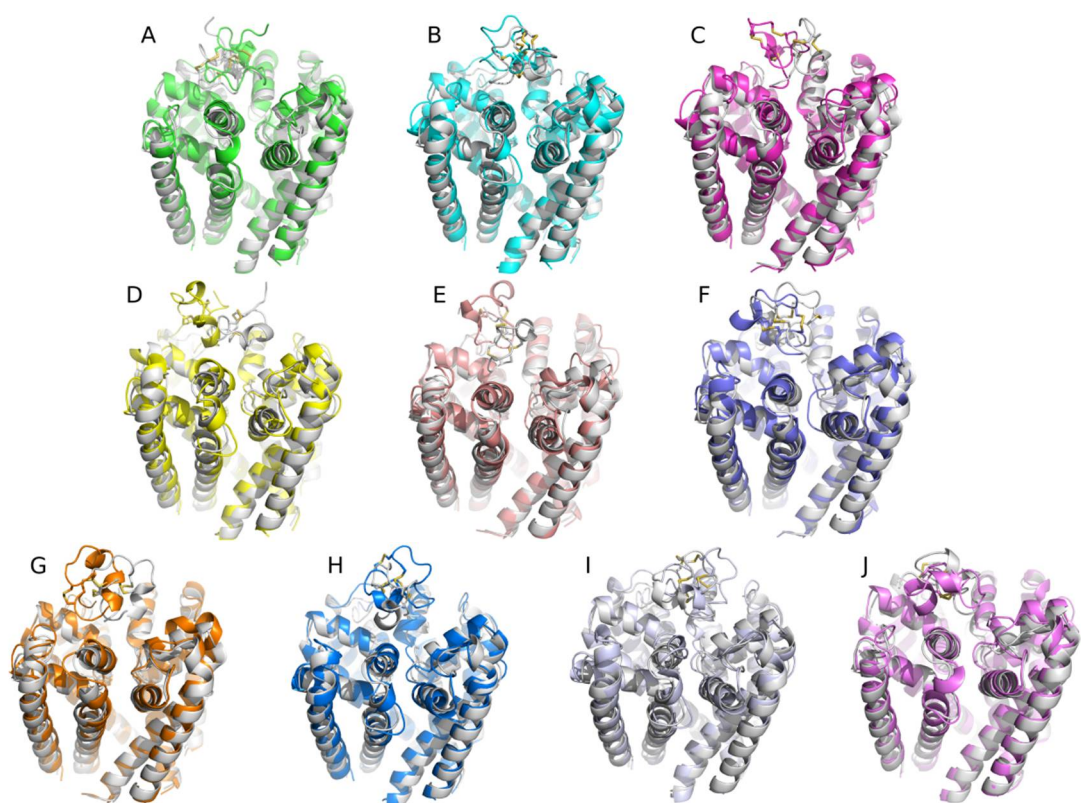

**Figure S3. Binding modes of the top 10 conformations refined using MD.** A) - J), Comparison of the MD refined 10 conformations of PIIIA bound with Nav1.4 (in varied colors) with conformations prior to MD (in gray). MD refinement could result in significant conformation deviation from that determined using docking.



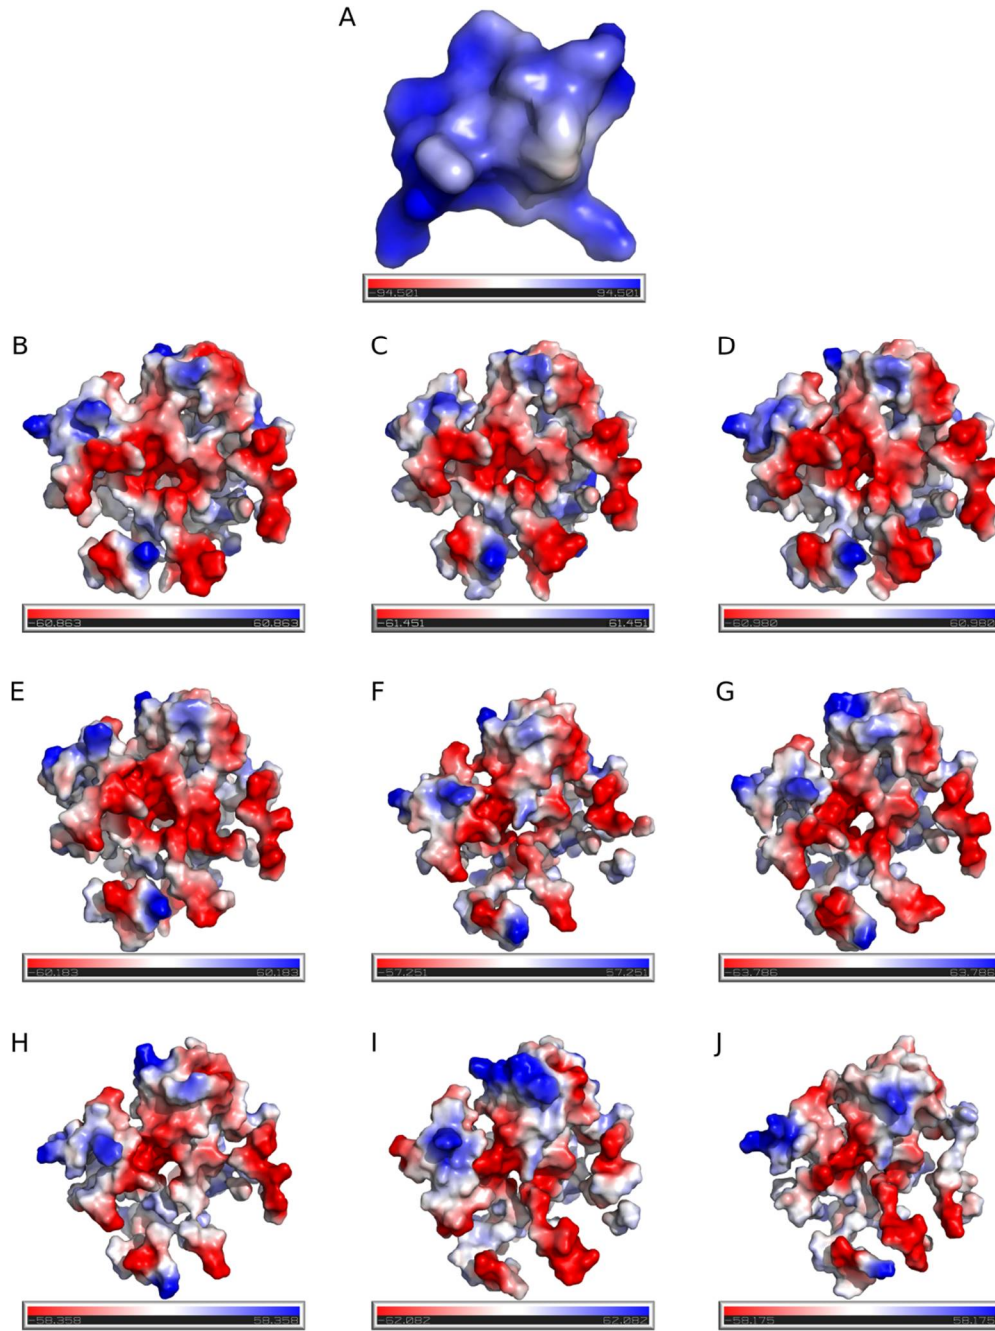

**Figure S4. Surface electrostatic potential of PIIIA and Nav channels.** A) shows the structure of PIIIA and five key residues on its surface; B) shows the electrostatic potential of PIIIA; C)–K), show the surface electrostatic potential of the pore domain/ or PIIIA binding site of Nav subtypes.

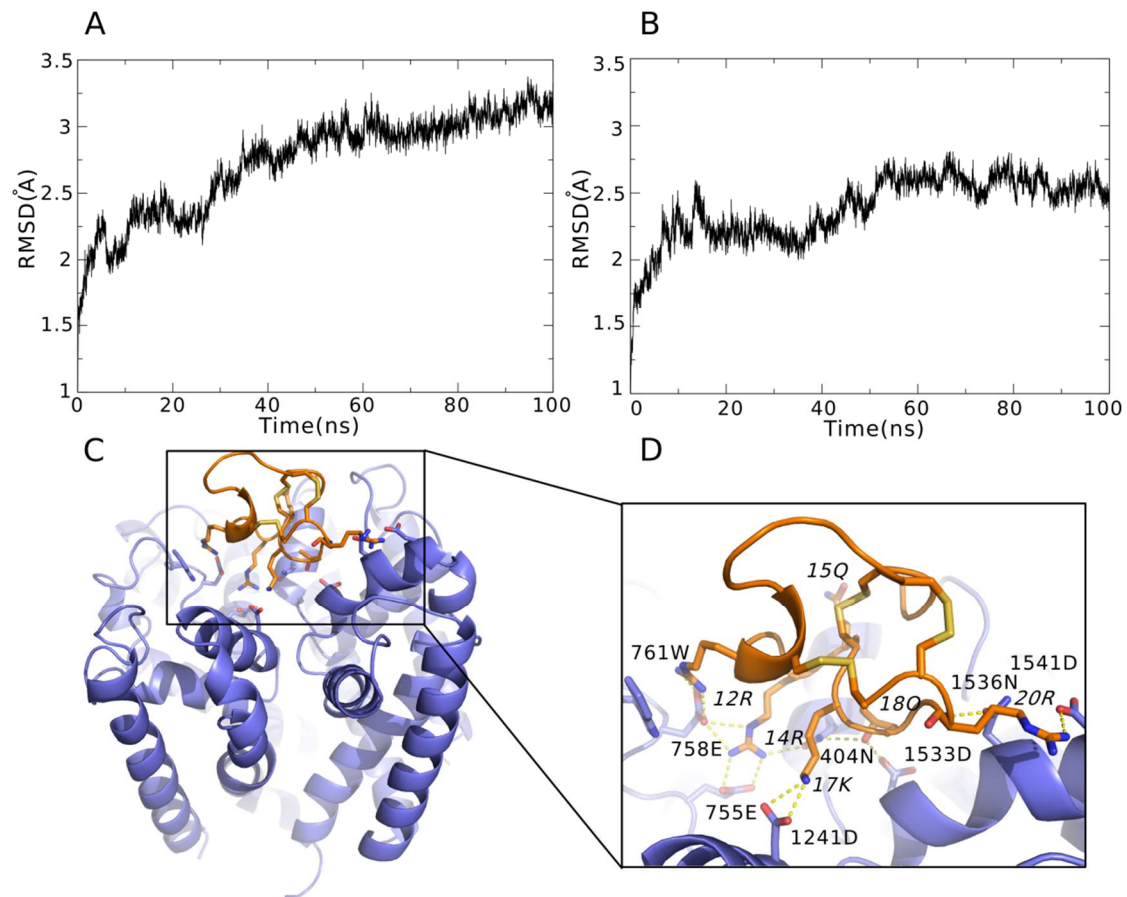

**Figure S5. Conformation of the Nav1.4 embedded in membrane in MD simulations.** Root mean square deviation (RMSD) for the backbone of Nav1.4 embedded in membrane in 100 ns non-restraint MD simulations. A),B) show the backbone RMSD of Nav1.4 in *apo* and bound with PI3A, respectively. C,D) show the binding mode of PI3A to Nav1.4. Residues at the PI3A were labelled in *italic*.

**Table S1. Energetic contribution for the side chain of the key residues at the binding site of**

**Na<sub>v</sub> subtypes.**

| <b>Na<sub>v</sub></b> | <b>401<sup>a</sup></b> | <b>404<sup>a</sup></b> | <b>408<sup>a</sup></b> | <b>755<sup>a</sup></b> | <b>758<sup>a</sup></b> | <b>761<sup>a</sup></b> | <b>1241<sup>a</sup></b> | <b>1532<sup>a</sup></b> | <b>1536<sup>a</sup></b> | <b>1541<sup>a</sup></b> |
|-----------------------|------------------------|------------------------|------------------------|------------------------|------------------------|------------------------|-------------------------|-------------------------|-------------------------|-------------------------|
| Na <sub>v</sub> 1.1   | -2.07                  | -6.18                  | -2.29                  | -5.29                  | -2.64                  | -0.90                  | -0.58                   | 0.67                    | -0.92                   | -3.31                   |
| Na <sub>v</sub> 1.2   | -1.91                  | -6.32                  | -2.23                  | -6.40                  | -2.32                  | -1.44                  | -1.05                   | 0.47                    | -1.00                   | -2.28                   |
| Na <sub>v</sub> 1.3   | -1.69                  | -4.52                  | -1.90                  | -6.50                  | -1.80                  | -1.69                  | -0.80                   | -0.89                   | -0.59                   | -1.32                   |
| Na <sub>v</sub> 1.4   | -2.07                  | -5.17                  | -1.68                  | -6.72                  | -3.34                  | -1.20                  | -1.58                   | 0.14                    | -1.67                   | -1.75                   |
| Na <sub>v</sub> 1.5   | -0.21                  | -1.71                  | -1.95                  | -3.82                  | -2.46                  | -1.21                  | -0.51                   | -0.27                   | -0.83                   | -1.46                   |
| Na <sub>v</sub> 1.6   | -1.91                  | -6.48                  | -2.03                  | -6.19                  | -2.42                  | -1.43                  | -0.95                   | 0.35                    | -2.28                   | -1.97                   |
| Na <sub>v</sub> 1.7   | -1.43                  | -5.61                  | -0.99                  | -5.90                  | -2.35                  | -0.51                  | -0.57                   | -0.07                   | -0.94                   | -2.71                   |
| Na <sub>v</sub> 1.8   | -0.50                  | -1.12                  | -1.15                  | -4.31                  | -0.83                  | -0.80                  | -0.77                   | 0.06                    | -1.90                   | -2.05                   |
| Na <sub>v</sub> 1.9   | -0.13                  | -0.80                  | -0.87                  | -3.67                  | -1.94                  | -1.19                  | -0.10                   | -0.98                   | -0.11                   | -0.01                   |

<sup>a</sup> Side chain energetic contribution was calculated based on binding energy decomposition using

MMGB/SA method.
